# Supplementary material for: Fractionation of stable carbon isotopes during acetate consumption by methanogenic and sulfidogenic microbial communities in rice paddy soils and lake sediments
Source: Copernicus journal article supplement (doi:10.5194/bg-2021-203), 2021-09-14
Supplement: Supplementary file 1 [file bg-2021-203-supplement.pdf]

## Supplemental Table and Figures

### Fractionation of stable carbon isotopes during acetate consumption by methanogenic and sulfidogenic microbial communities in rice paddy soils and lake sediments

Ralf Conrad, Pengfei Liu, Peter Claus

#### Legends of the supplemental figures

Fig.S1: Acetate conversion to CH<sub>4</sub> and CO<sub>2</sub> in unbuffered suspensions of paddy soil from Vercelli (Italy) without additions (water control), with gypsum, and with CH<sub>3</sub>F. The panels show the temporal change of (A) concentrations of acetate; (B)  $\delta^{13}\text{C}$  of acetate; (C) partial pressures of CH<sub>4</sub> (1 ppmv = 10<sup>-6</sup> bar); (D)  $\delta^{13}\text{C}$  of CH<sub>4</sub>; (E) partial pressures of CO<sub>2</sub> (1 ppmv = 10<sup>-6</sup> bar); and (F)  $\delta^{13}\text{C}$  of CO<sub>2</sub>. Means  $\pm$  SE, n = 2.

Fig.S2: Mariotti plots of (A, B) acetate consumption and (C, D) CH<sub>4</sub> production in (A, C) the absence (control) and (B, D) the presence of gypsum (+ sulfate) in 4 replicates of unbuffered suspensions of paddy soil from Vercelli.

Fig.S3: Acetate conversion to CH<sub>4</sub> and CO<sub>2</sub> in phosphate-buffered (pH 7) suspensions of paddy soil from Vercelli (Italy) without (H<sub>2</sub>O) and with addition of acetate (acetate) and with acetate and CH<sub>3</sub>F. The soil was preincubated in the absence of sulfate, but sulfate (gypsum) was for the experimental incubation. The panels show the temporal change of (A) concentrations of acetate; (B)  $\delta^{13}\text{C}$  of acetate; (C) partial pressures of CH<sub>4</sub> (1 ppmv = 10<sup>-6</sup> bar); (D)  $\delta^{13}\text{C}$  of CH<sub>4</sub>; (E) partial pressures of CO<sub>2</sub> (1 ppmv = 10<sup>-6</sup> bar); (F)  $\delta^{13}\text{C}$  of CO<sub>2</sub>. Means  $\pm$  SE, n = 3.

Fig.S4: Balance of the produced CH<sub>4</sub> + TIC against acetate consumed in phosphate-buffered suspensions of paddy soil from Vercelli and IRRI, and of sediments from the NE and SW basin of Lake Fuchskuhle. The figures show individual replicates (n = 3) of the unamended control (methanogenic conditions); of the experiment plus gypsum

(CaSO<sub>4</sub>-1); of preincubation and experiment plus gypsum (CaSO<sub>4</sub>-2). The diagonal line indicates stoichiometric conversion (disproportionation) of acetate to CH<sub>4</sub> + CO<sub>2</sub>.

Fig.S5: Acetate conversion to CH<sub>4</sub> and CO<sub>2</sub> in phosphate-buffered (pH 7) suspensions of paddy soil from IRRI (the Philippines) without addition of acetate (H<sub>2</sub>O), with addition of acetate (acetate) and with addition of acetate and CH<sub>3</sub>F (Acet + CH<sub>3</sub>F). The soil was preincubated in the absence of sulfate, and sulfate (gypsum) was also not added for the experimental incubation. The panels show the temporal change of (A) concentrations of acetate; (B)  $\delta^{13}\text{C}$  of acetate; (C) partial pressures of CH<sub>4</sub> (1 ppmv = 10<sup>-6</sup> bar); (D)  $\delta^{13}\text{C}$  of CH<sub>4</sub>; (E) partial pressures of CO<sub>2</sub> (1 ppmv = 10<sup>-6</sup> bar); (D)  $\delta^{13}\text{C}$  of CO<sub>2</sub>. Means  $\pm$  SE, n = 3.

Fig.S6: Acetate conversion to CH<sub>4</sub> and CO<sub>2</sub> in phosphate-buffered (pH 7) suspensions of paddy soil from IRRI (the Philippines) without addition of acetate (H<sub>2</sub>O), with addition of acetate (acetate) and with addition of acetate and CH<sub>3</sub>F (Acet + CH<sub>3</sub>F). The soil was preincubated in the absence of sulfate, but sulfate (gypsum) was for the experimental incubation. The panels show the temporal change of (A) concentrations of acetate; (B)  $\delta^{13}\text{C}$  of acetate; (C) partial pressures of CH<sub>4</sub> (1 ppmv = 10<sup>-6</sup> bar); (D)  $\delta^{13}\text{C}$  of CH<sub>4</sub>; (E) partial pressures of CO<sub>2</sub> (1 ppmv = 10<sup>-6</sup> bar); (D)  $\delta^{13}\text{C}$  of CO<sub>2</sub>. Means  $\pm$  SE, n = 3.

Fig.S7: Acetate conversion to CH<sub>4</sub> and CO<sub>2</sub> in phosphate-buffered (pH 7) suspensions of paddy soil from IRRI (the Philippines) without addition of acetate (H<sub>2</sub>O), with addition of acetate (acetate) and with addition of acetate and CH<sub>3</sub>F (Acet + CH<sub>3</sub>F). The soil was preincubated in the presence of sulfate, and sulfate (gypsum) was also added for the experimental incubation. The panels show the temporal change of (A) concentrations of acetate; (B)  $\delta^{13}\text{C}$  of acetate; (C) partial pressures of CH<sub>4</sub> (1 ppmv = 10<sup>-6</sup> bar); (D)  $\delta^{13}\text{C}$  of CH<sub>4</sub>; (E) partial pressures of CO<sub>2</sub> (1 ppmv = 10<sup>-6</sup> bar); (D)  $\delta^{13}\text{C}$  of CO<sub>2</sub>. Means  $\pm$  SE, n = 3.

Fig.S8: Balance of the produced CH<sub>4</sub> + TIC against acetate consumed in phosphate-buffered suspensions of paddy soil from Vercelli and IRRI, and of sediments from the NE and SW basin of Lake Fuchskuhle. The figures show individual replicates (n = 3) of the

unamended control (methanogenic conditions); of the experiment plus gypsum ( $\text{CaSO}_4$ -1); of preincubation and experiment plus gypsum ( $\text{CaSO}_4$ -2). The diagonal line indicates stoichiometric conversion (disproportionation) of acetate to  $\text{CH}_4 + \text{CO}_2$ . The figure is identical to Fig.S4, but background production of  $\text{CH}_4$  and  $\text{CO}_2$  in the water control without addition of acetate was subtracted.

Fig.S9: Mariotti plots of (A, B, E) acetate consumption and (C, D, F)  $\text{CH}_4$  production in (A, C) the absence (no sulfate); (B, D) the presence of gypsum (with sulfate); and (E, F) after preincubation with sulfate and in the presence of sulfate in 3 replicates of phosphate-buffered suspensions of paddy soil from Vercelli.

Fig.S10: Mariotti plots of (A, B, E) acetate consumption and (C, D, F)  $\text{CH}_4$  production in (A, C) the absence (no sulfate); (B, D) the presence of gypsum (with sulfate); and (E, F) after preincubation with sulfate and in the presence of sulfate in 3 replicates of phosphate-buffered suspensions of paddy soil from the IRRI.

Fig.S11: Mariotti plots of acetate consumption in the presence of methyl fluoride ( $\text{CH}_3\text{F}$ ) in (A, C) the presence of gypsum (with sulfate); and (B, D) after preincubation with sulfate and in the presence of sulfate, in 3 replicates of phosphate-buffered suspensions of paddy soil from (A, B) Vercelli and (C, D) the IRRI.

Fig.S12: Acetate conversion to  $\text{CH}_4$  and  $\text{CO}_2$  in phosphate-buffered (pH 7) suspensions of lake sediment from the SW basin of Fuchskuhle without addition of acetate ( $\text{H}_2\text{O}$ ), with addition of acetate (acetate) and with addition of acetate and  $\text{CH}_3\text{F}$  (Acet +  $\text{CH}_3\text{F}$ ). The sediment was incubated in the absence of sulfate. The panels show the temporal change of (A) concentrations of acetate; (B)  $\delta^{13}\text{C}$  of acetate; (C) partial pressures of  $\text{CH}_4$  (1 ppmv =  $10^{-6}$  bar); (D)  $\delta^{13}\text{C}$  of  $\text{CH}_4$ ; (E) partial pressures of  $\text{CO}_2$  (1 ppmv =  $10^{-6}$  bar); (F)  $\delta^{13}\text{C}$  of  $\text{CO}_2$ . Means  $\pm$  SE, n = 3.

Fig.S13: Acetate conversion to  $\text{CH}_4$  and  $\text{CO}_2$  in phosphate-buffered (pH 7) suspensions of lake sediment from the SW basin of Fuchskuhle without addition of acetate ( $\text{H}_2\text{O}$ ), with addition of acetate (acetate) and with addition of acetate and  $\text{CH}_3\text{F}$  (Acet +  $\text{CH}_3\text{F}$ ). The sediment was incubated in the presence of sulfate, and sulfate (gypsum) was also not added for the experimental incubation. The panels show the temporal

change of (A) concentrations of acetate; (B)  $\delta^{13}\text{C}$  of acetate; (C) partial pressures of  $\text{CH}_4$  (1 ppmv =  $10^{-6}$  bar); (D)  $\delta^{13}\text{C}$  of  $\text{CH}_4$ ; (E) partial pressures of  $\text{CO}_2$  (1 ppmv =  $10^{-6}$  bar); (D)  $\delta^{13}\text{C}$  of  $\text{CO}_2$ . Means  $\pm$  SE, n = 3.

Fig.S14: Mariotti plots of (A, B) acetate consumption and (C, D)  $\text{CH}_4$  production in (A, C) the absence (no sulfate) and (B, D) the presence (both preincubation and experimental incubation) of gypsum (plus sulfate) in 3 replicates of buffered suspensions of lake sediment from the NE basin of Fuchskuhle.

Fig.S15: Mariotti plots of (A, B) acetate consumption and (C, D)  $\text{CH}_4$  production in (A, C) the absence (no sulfate) and (B, D) the presence (both preincubation and experimental incubation) of gypsum (plus sulfate) in 4 replicates of buffered suspensions of lake sediment from the SW basin of Fuchskuhle.

Fig.S16: Mariotti plots of acetate consumption in the presence of methyl fluoride ( $\text{CH}_3\text{F}$ ) after preincubation and in the presence of gypsum (with sulfate) in 3 replicates of phosphate-buffered suspensions of lake sediment from the (A) NE basin and (B) SW basin of Fuchskuhle.

Table S1: Epsilon values (negative values) determined using Mariotti plots of <sup>13</sup>C-acetate or <sup>13</sup>CH<sub>4</sub> in unbuffered or phosphate-buffer suspensions without and with addition of sulfate, also after preincubation with sulfate, and in the absence and presence of methyl fluoride

|                 |                        | ε               |      |              |      |               |      |                                  |      |                                  |      |
|-----------------|------------------------|-----------------|------|--------------|------|---------------|------|----------------------------------|------|----------------------------------|------|
|                 |                        |                 |      |              |      | Preincubation |      |                                  |      | Preincubation                    |      |
| Soil            | δ <sup>13</sup> C used | without sulfate |      | with sulfate |      | with sulfate  |      | with sulfate + CH <sub>3</sub> F |      | with sulfate + CH <sub>3</sub> F |      |
|                 |                        | mean            | SE   | mean         | SE   | mean          | SE   | mean                             | SE   | mean                             | SE   |
| Vercelli-soil   | acetate                | 17.2            | 0.93 | 19.5         | 0.34 |               |      |                                  |      |                                  |      |
|                 | CH <sub>4</sub>        | 18.9            | 2.03 | 14.1         | 1.96 |               |      |                                  |      |                                  |      |
| IRRI-soil       | acetate                | 20.2            | 0.80 | 20.6         | 0.62 |               |      |                                  |      |                                  |      |
|                 | CH <sub>4</sub>        | 21.6            | 3.23 | 19.4         | 1.42 |               |      |                                  |      |                                  |      |
| Vercelli-buffer | acetate                | 17.7            | 0.53 | 21.1         | 1.27 | 21.4          | 0.20 | 21.8                             | 2.47 | 24.3                             | 0.54 |
|                 | CH <sub>4</sub>        | 29.7            | 0.61 | 22.9         | 1.30 | 24.9          | 1.54 |                                  |      |                                  |      |
| IRRI-buffer     | acetate                | 20.0            | 2.41 | 19.1         | 0.51 | 21.2          | 1.98 | 23.8                             | 5.59 | 10.1                             | 1.12 |
|                 | CH <sub>4</sub>        | 37.2            | 6.86 | 28.9         | 3.68 | 32.8          | 6.82 |                                  |      |                                  |      |
| NE-buffer       | acetate                | 18.9            | 1.01 |              |      | 19.7          | 1.41 |                                  |      | 26.3                             | 3.28 |
|                 | CH <sub>4</sub>        | 27.9            | 2.46 |              |      |               |      |                                  |      |                                  |      |
| SW-buffer       | acetate                | 11.4            | 1.47 |              |      | 14.3          | 1.30 |                                  |      | 17.8                             | 0.06 |
|                 | CH <sub>4</sub>        | 27.4            | 3.20 |              |      |               |      |                                  |      |                                  |      |

# Vercelli Soil slurry

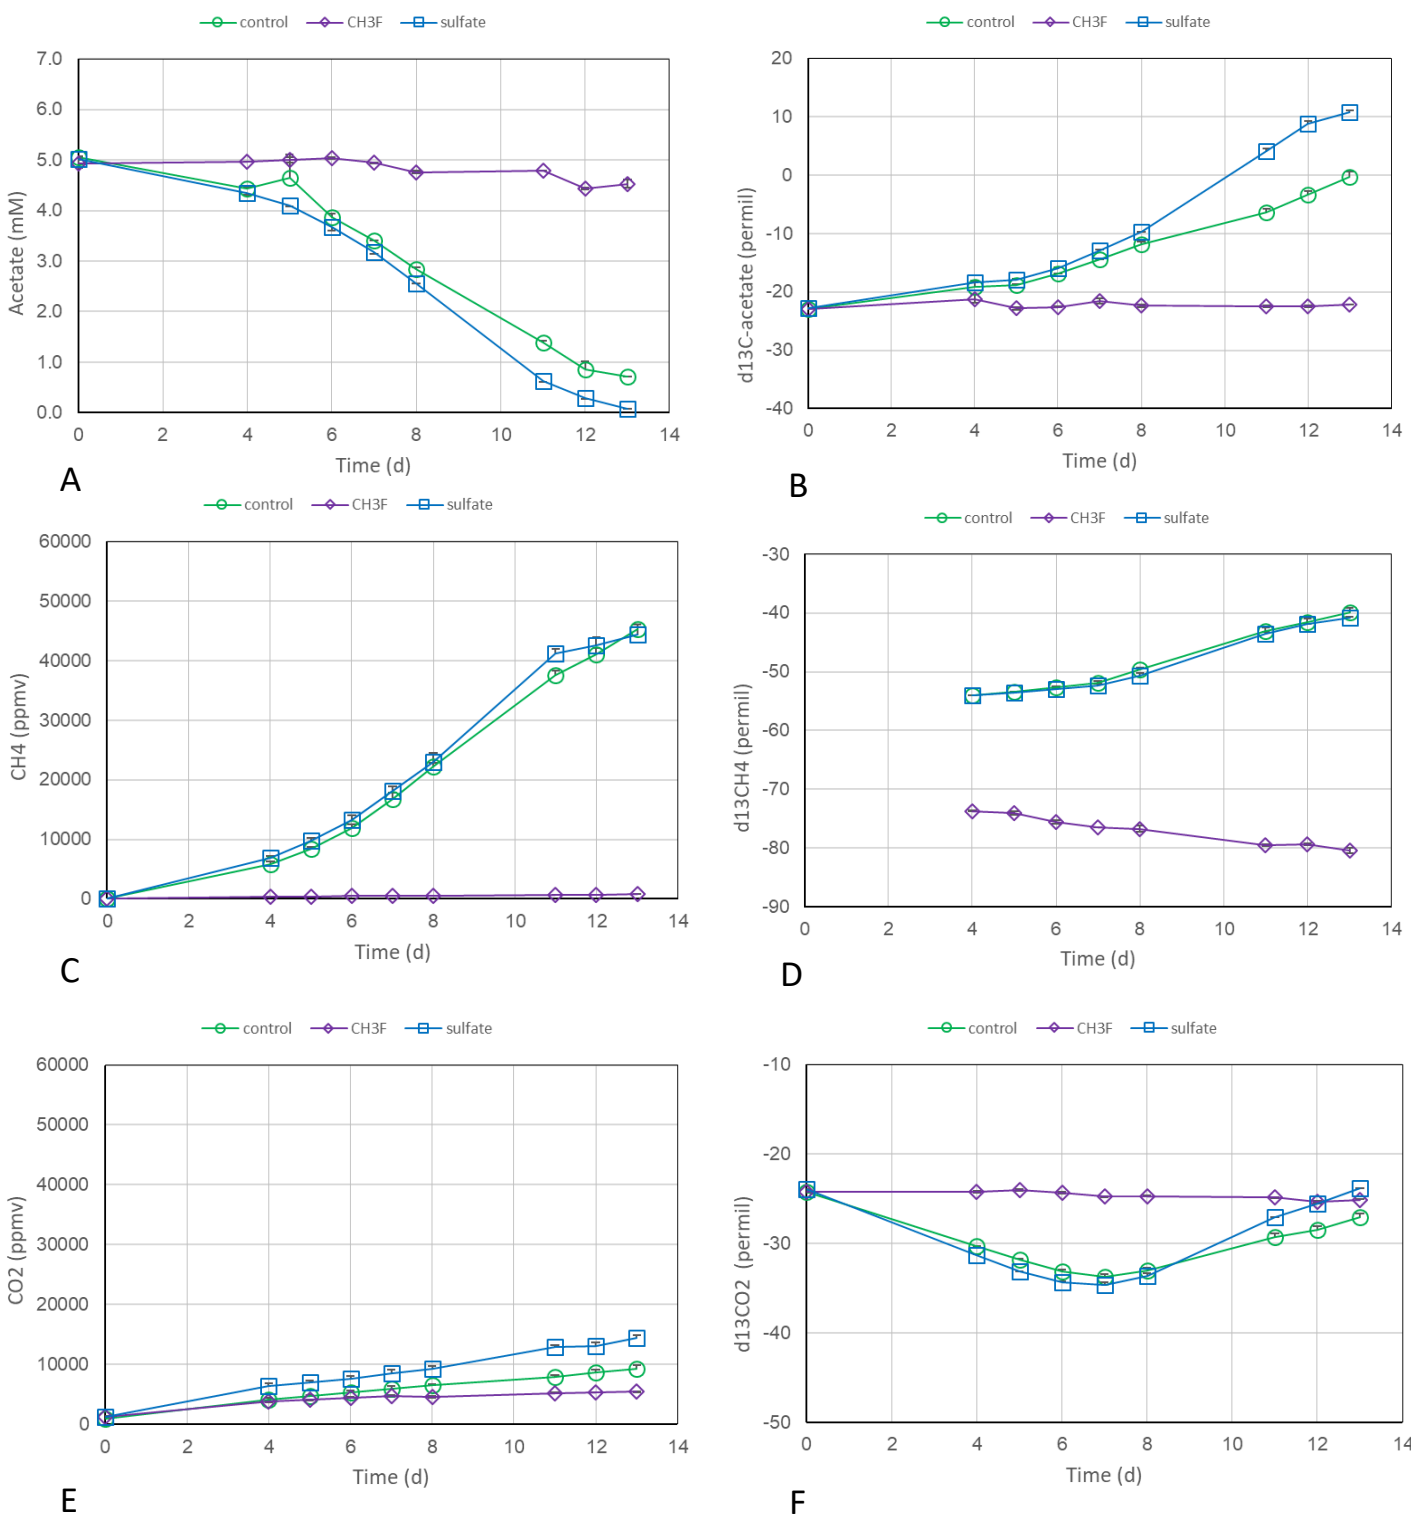

Fig. S1

# Vercelli

control

+ sulfate

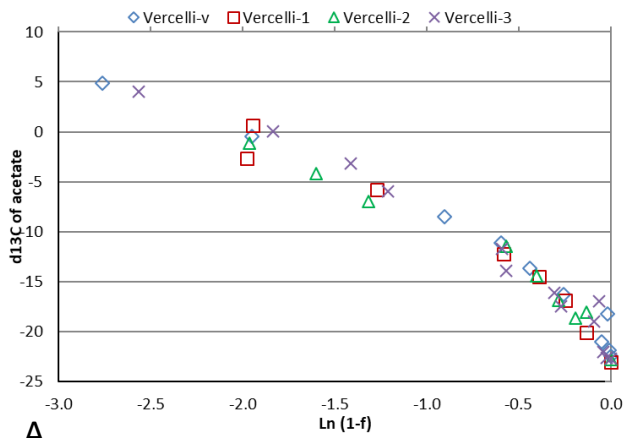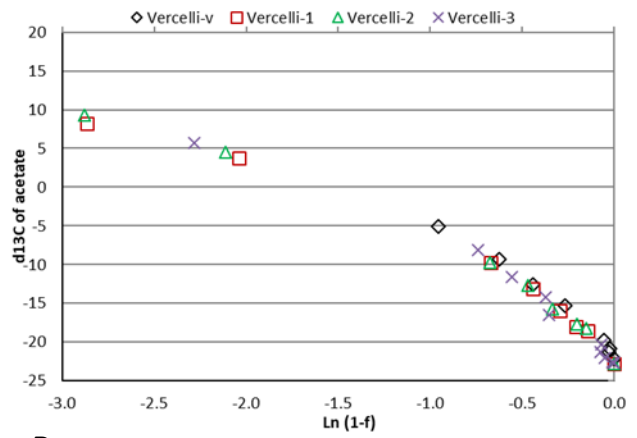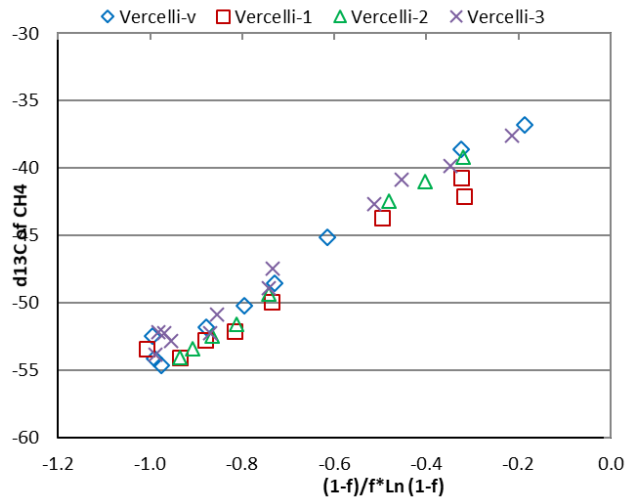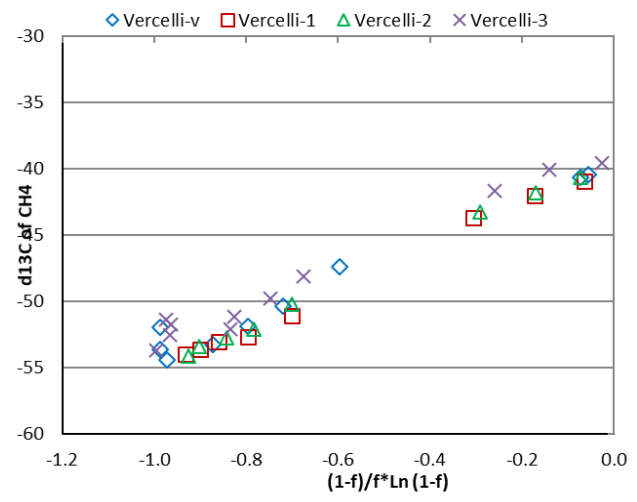

Fig. S2

# Vercelli with sulfate

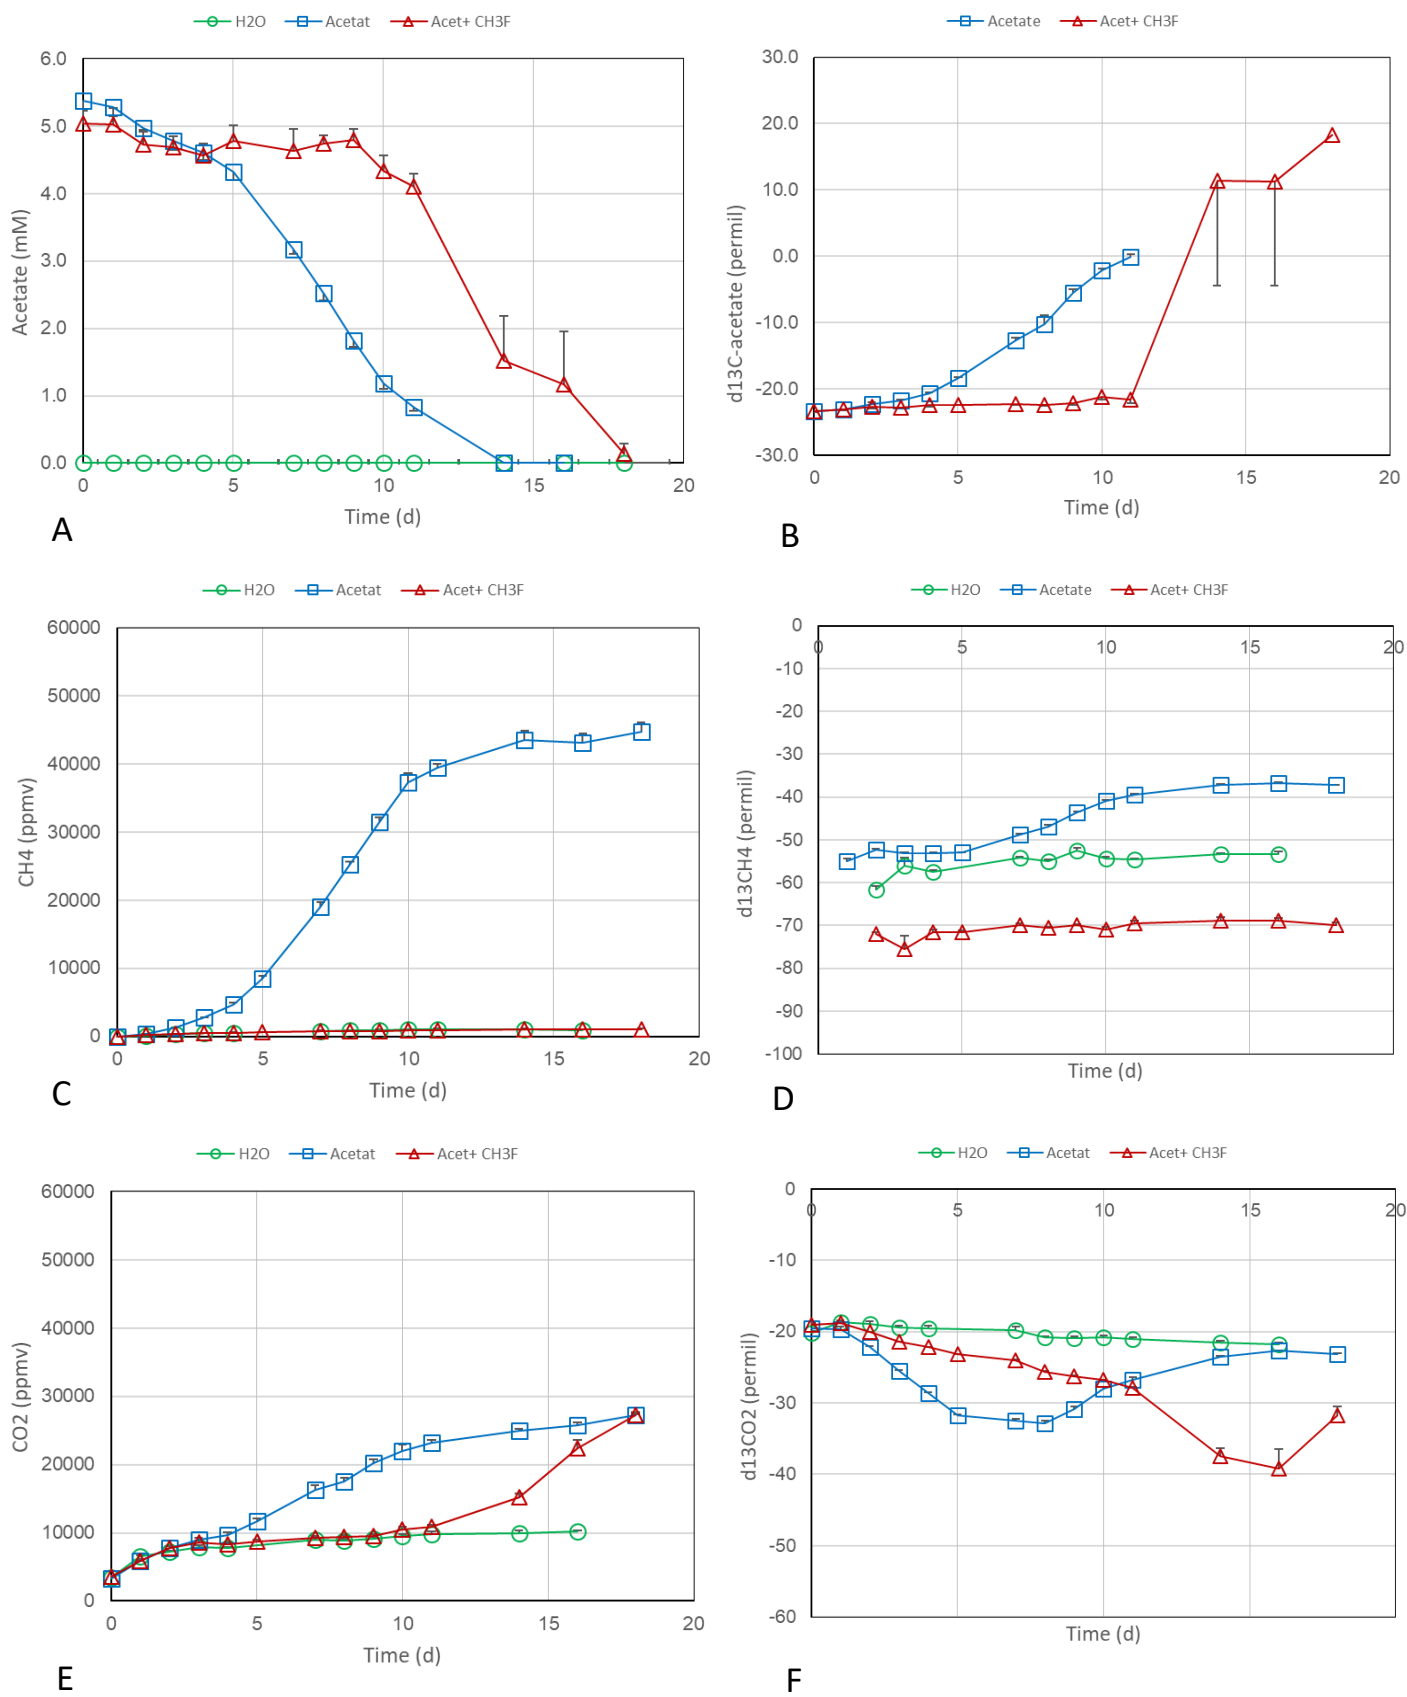

Fig. S3

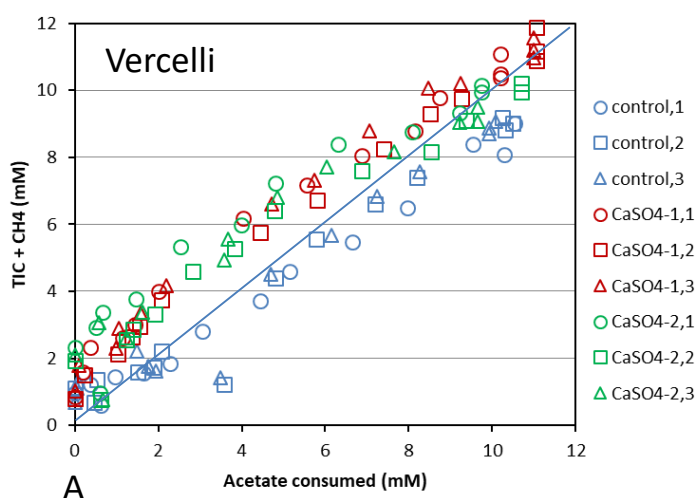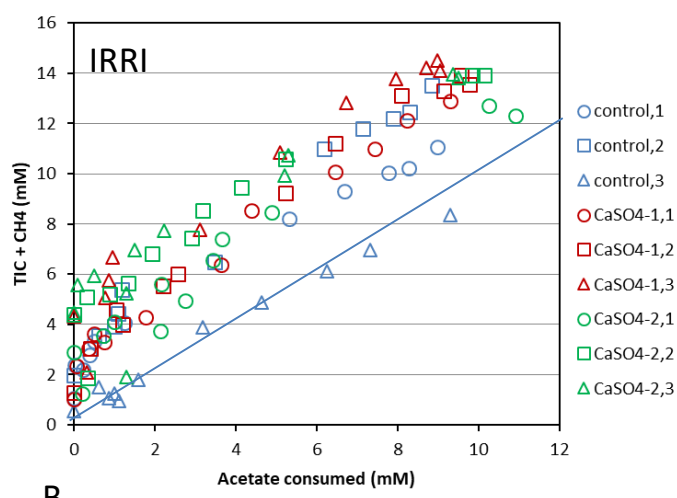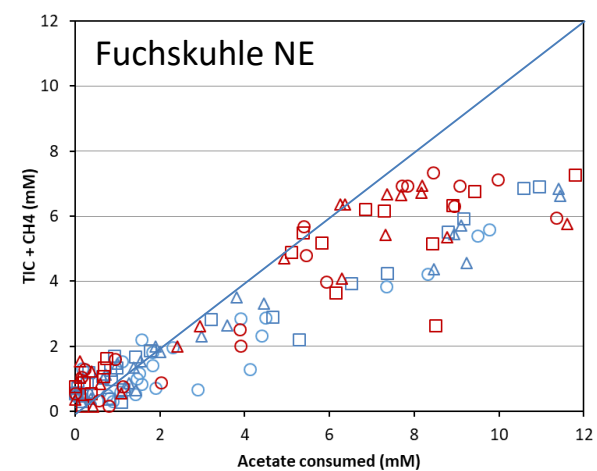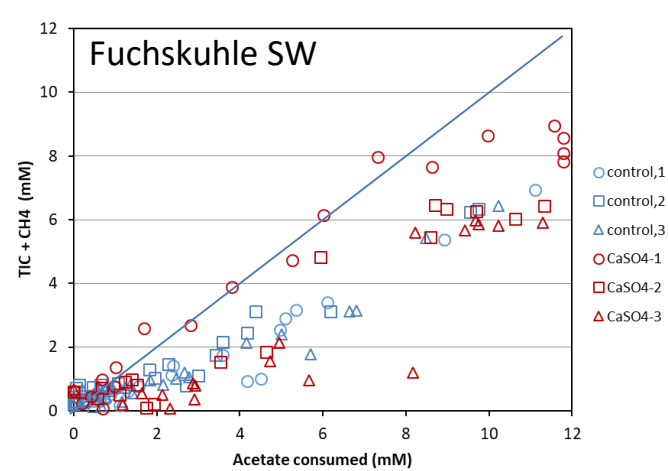

Fig. S4

# IRRI without sulfate

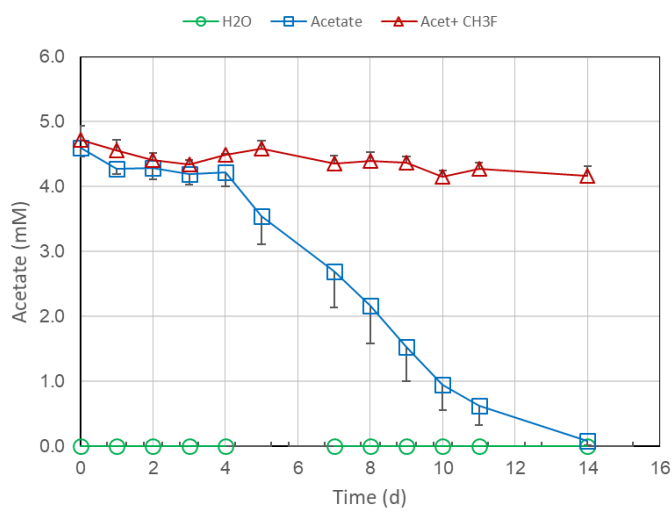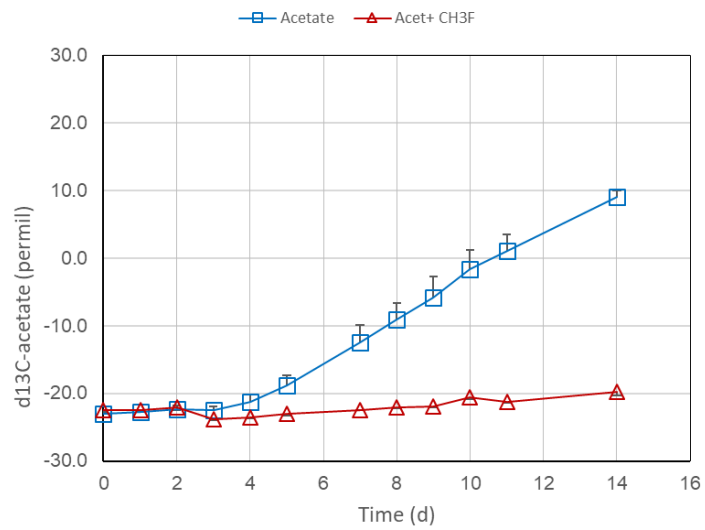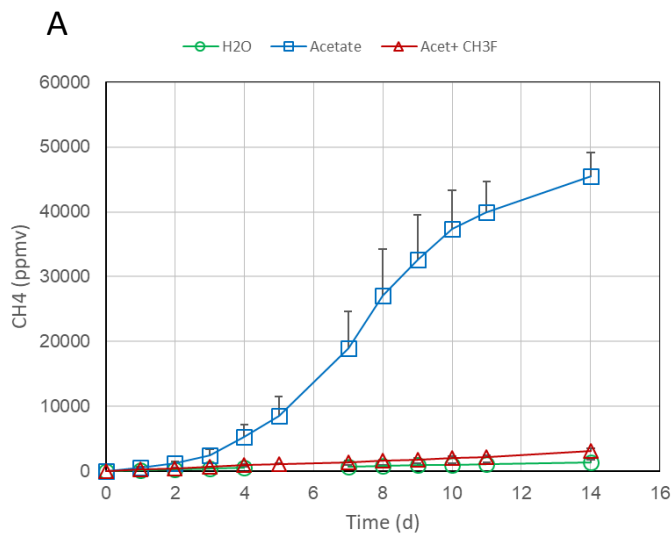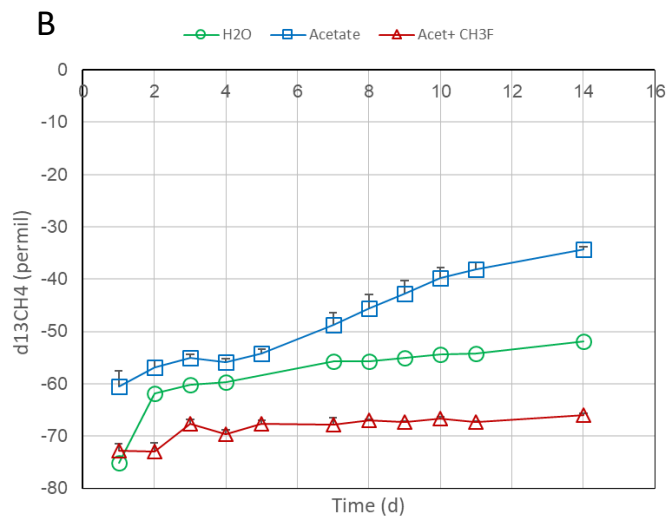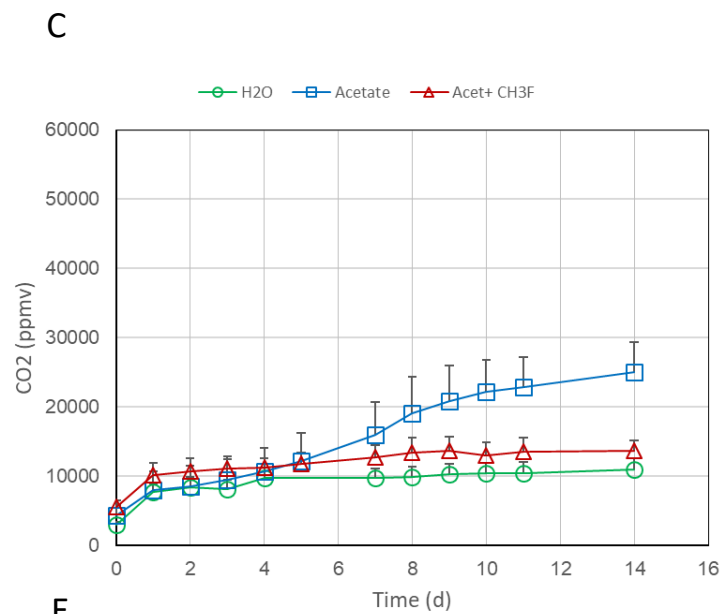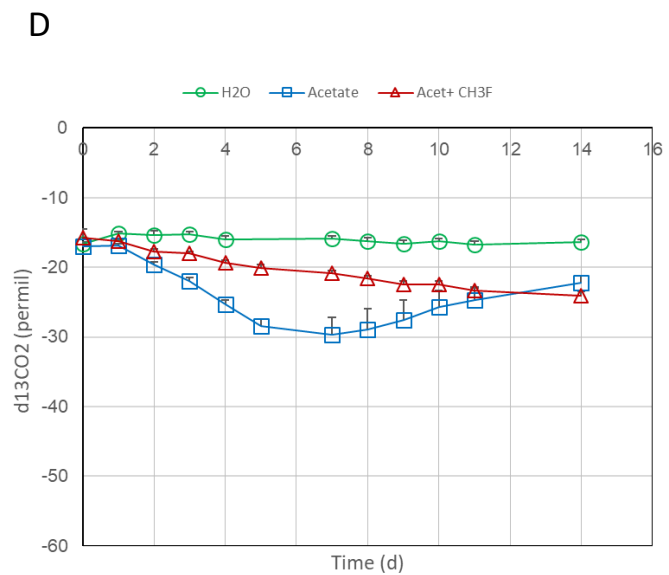

Fig. S5

# IRRI with sulfate

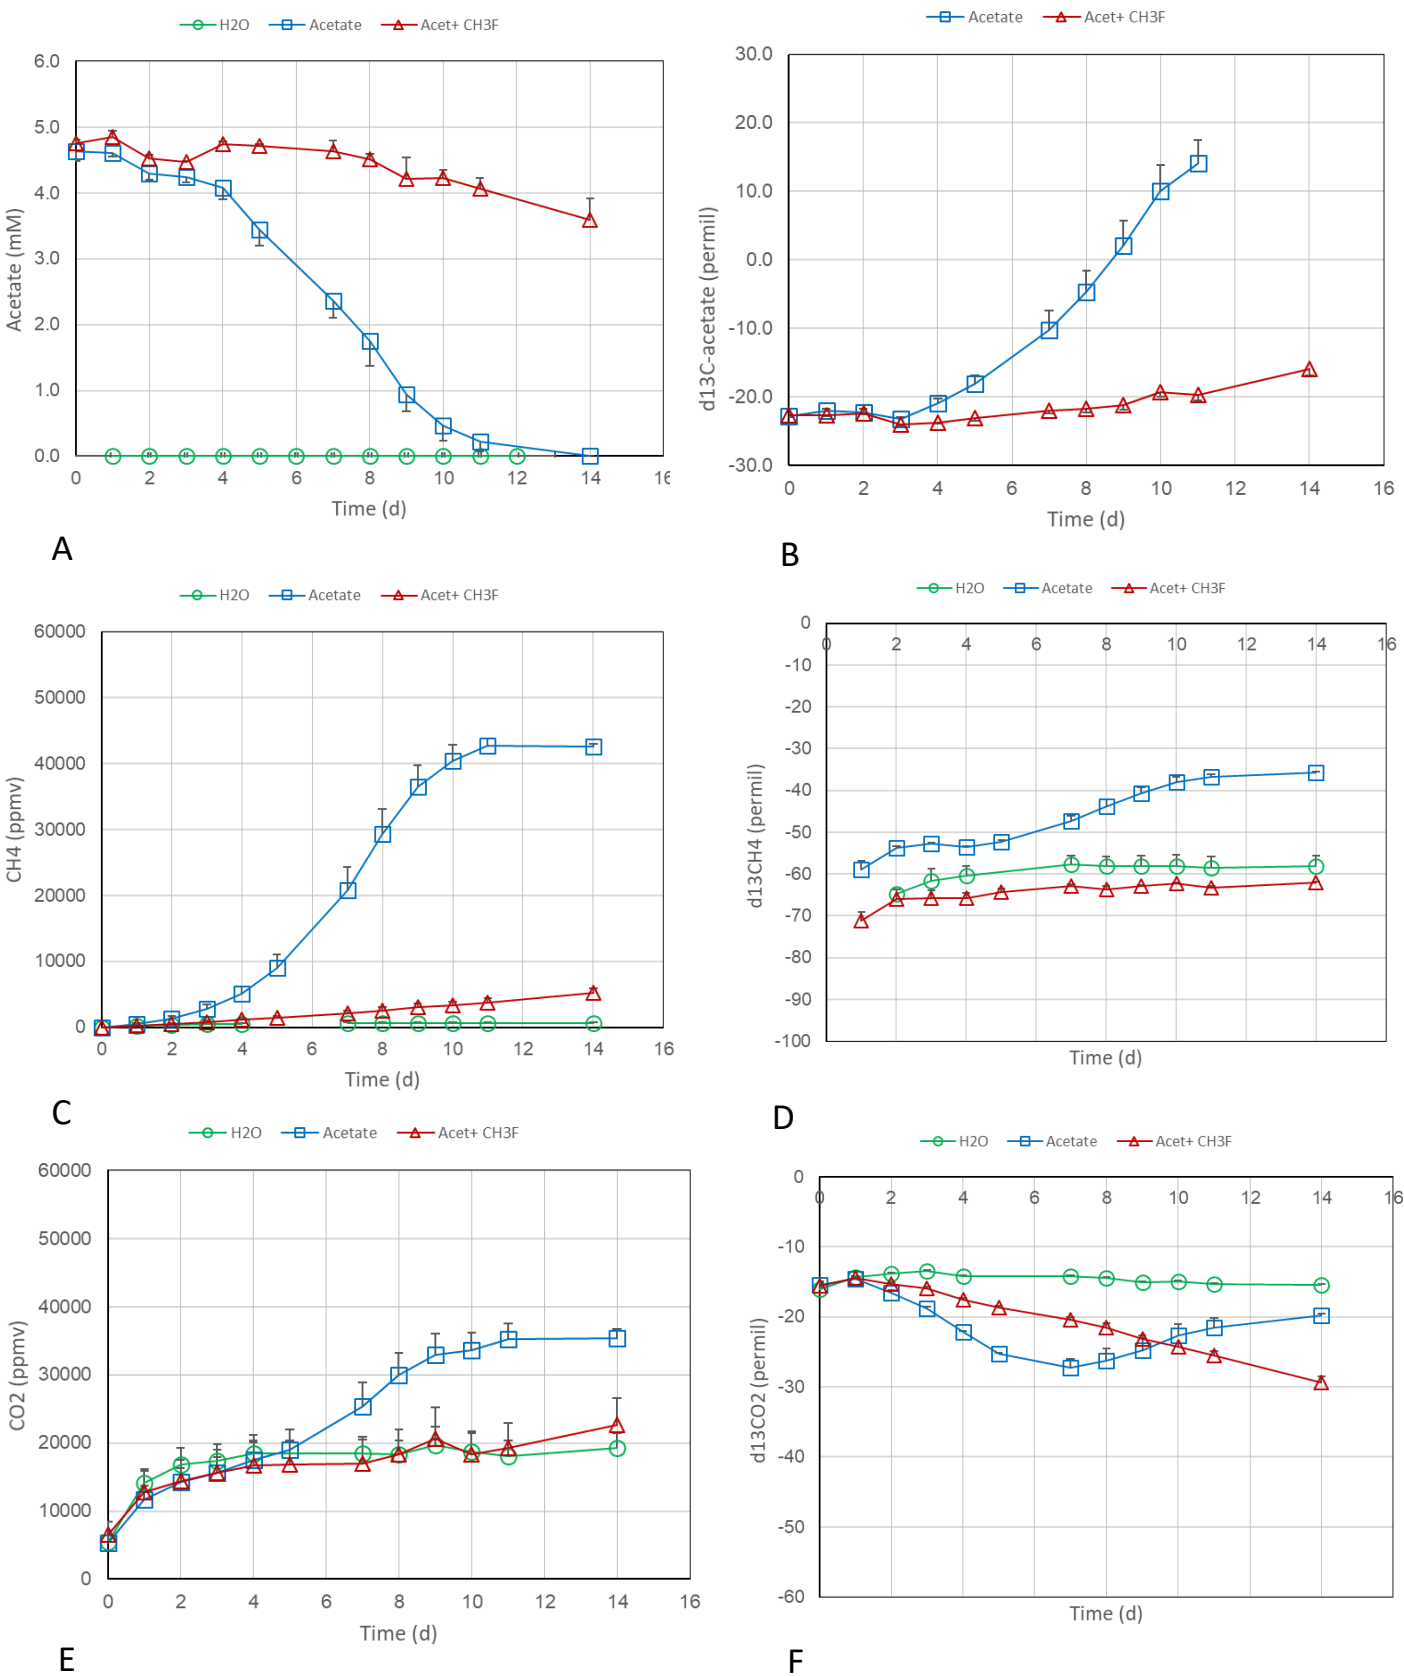

Fig. S6

# IRRI

## with sulfate, with preincubation

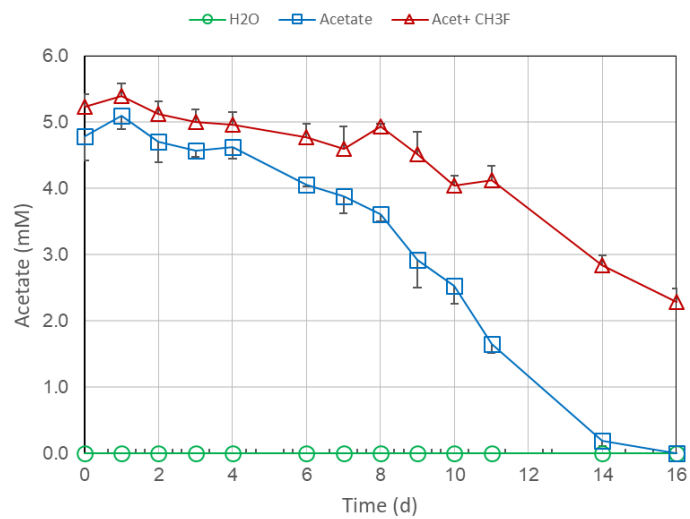

A

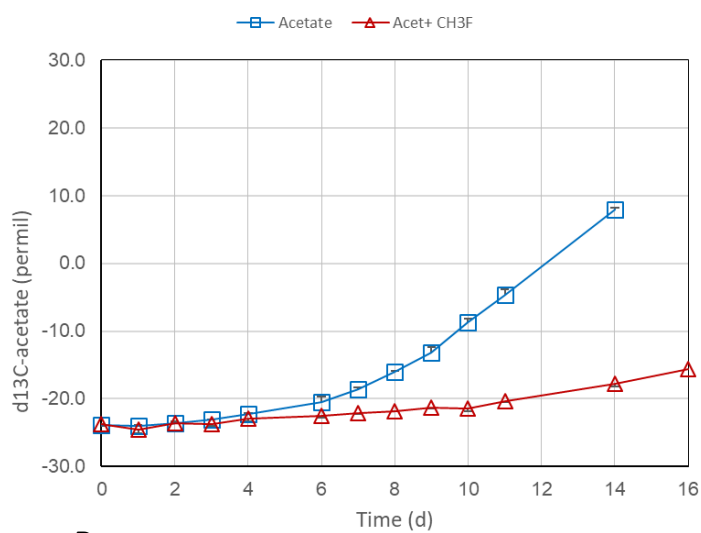

B

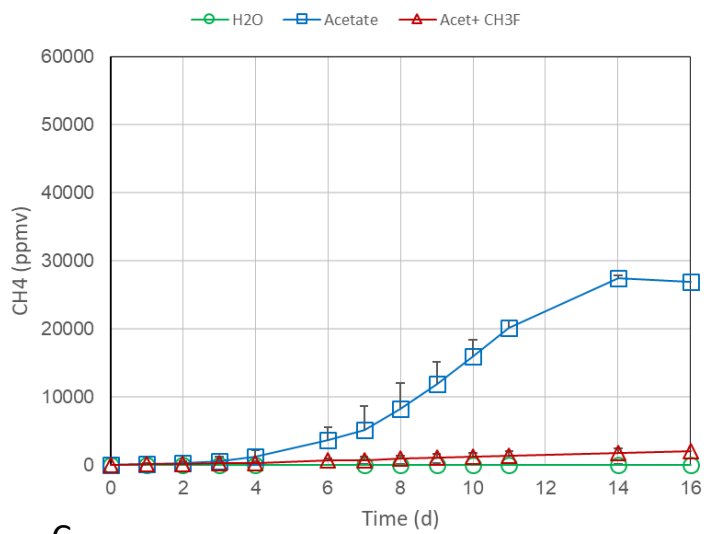

C

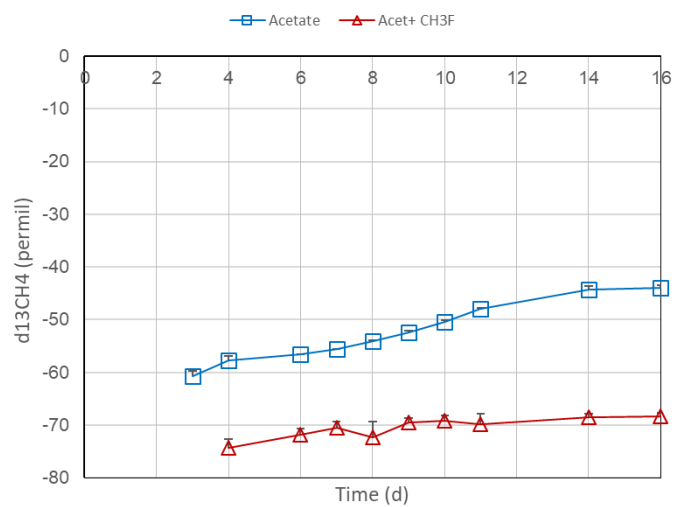

D

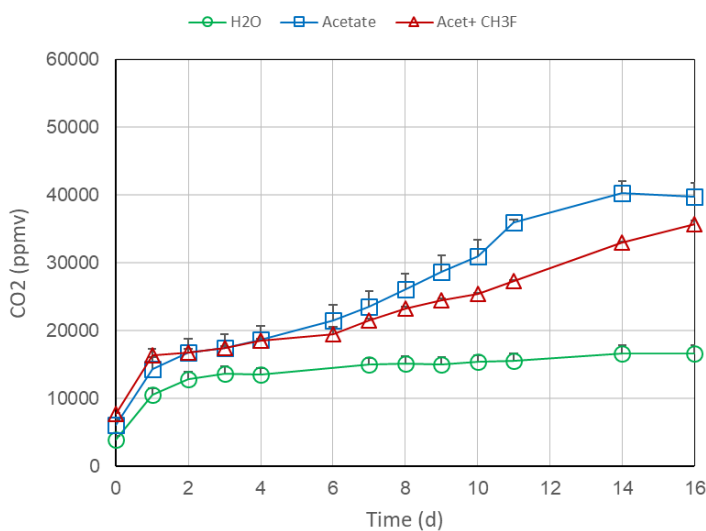

E

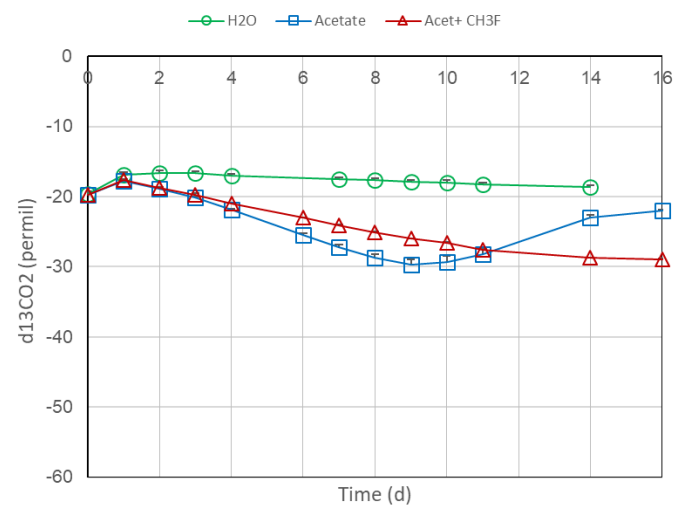

F

Fig. S7

## Vercelli

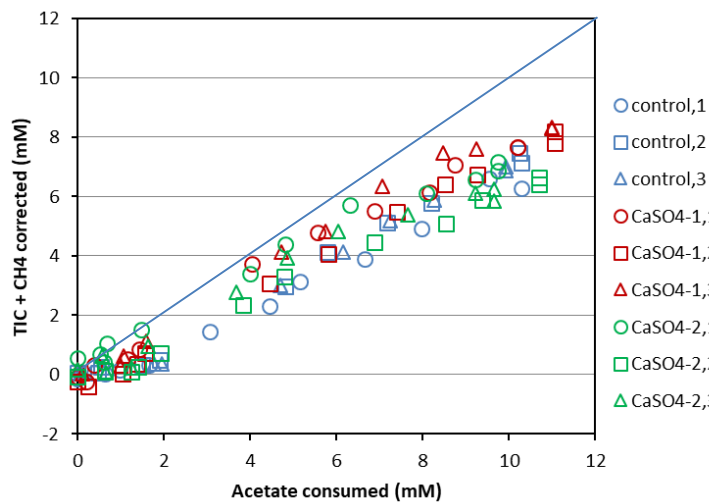

A

## IRRI

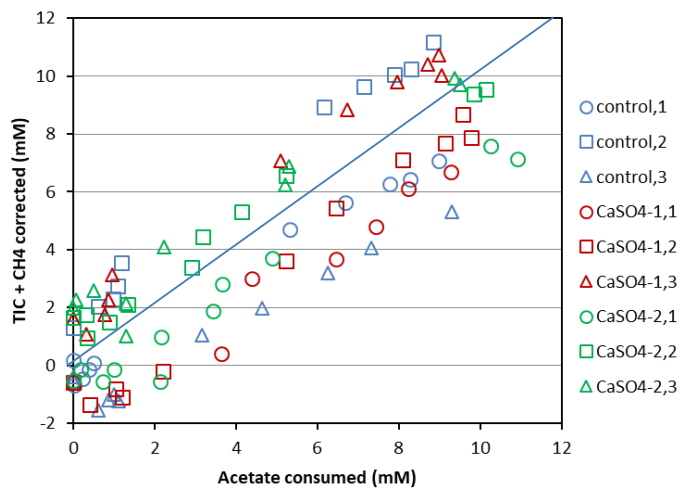

B

## NE

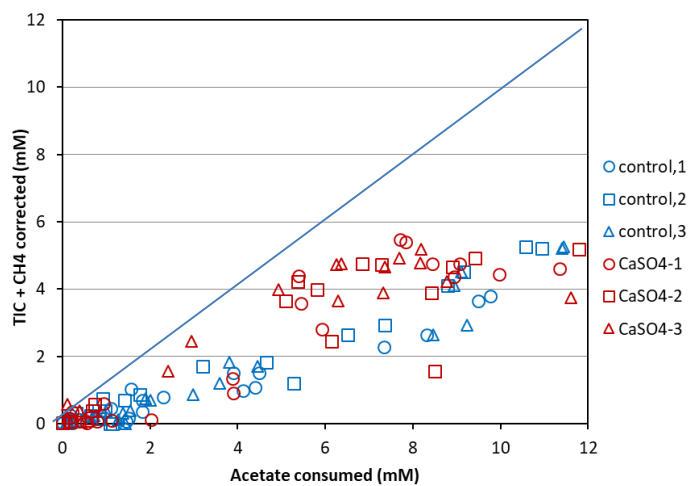

C

## SW

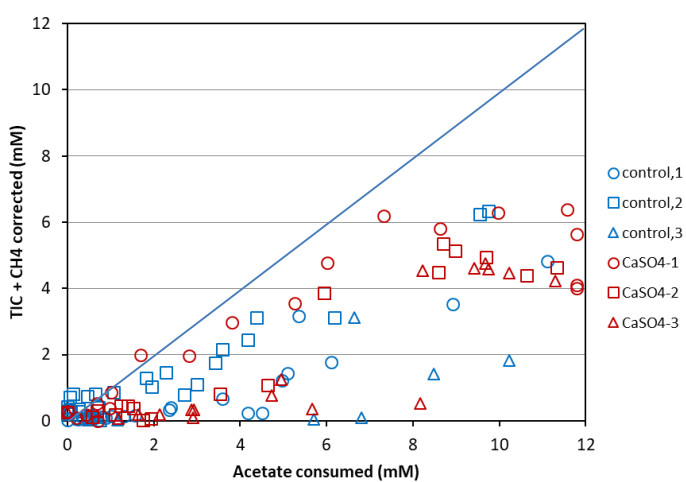

D

Fig. S8

# Vercelli

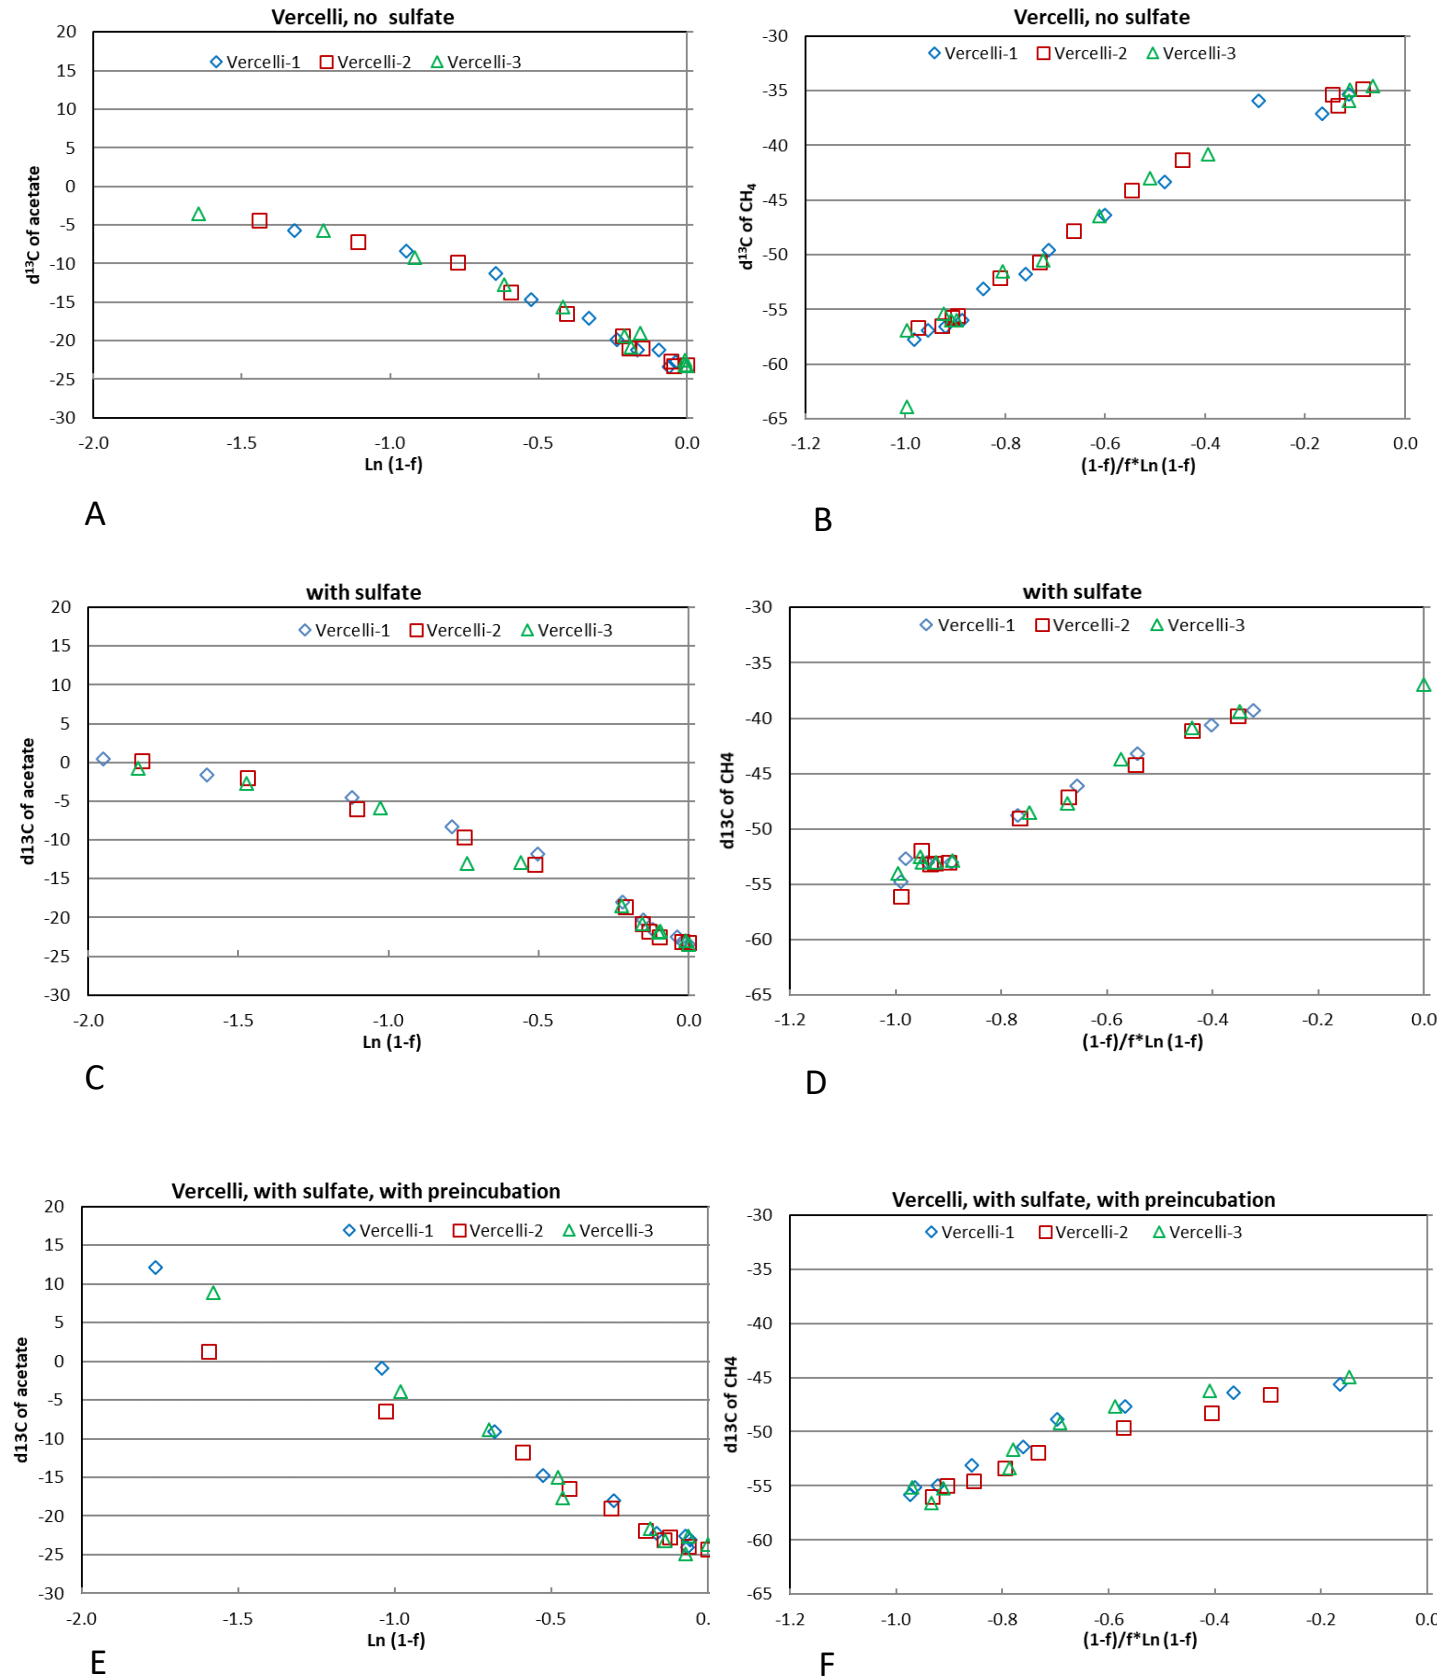

Fig. S9

# IRRI

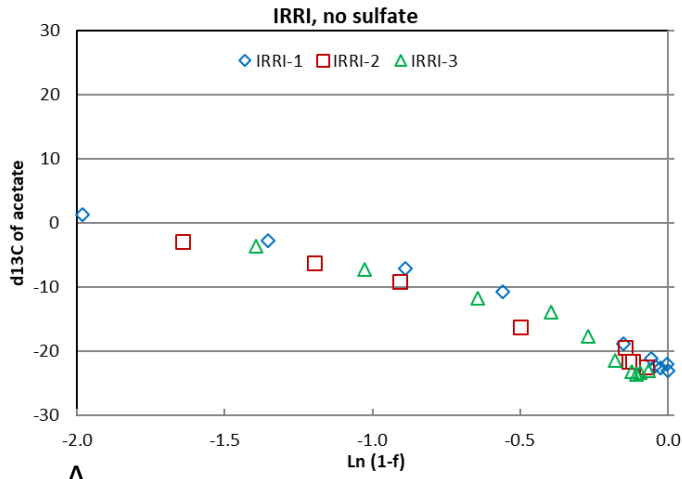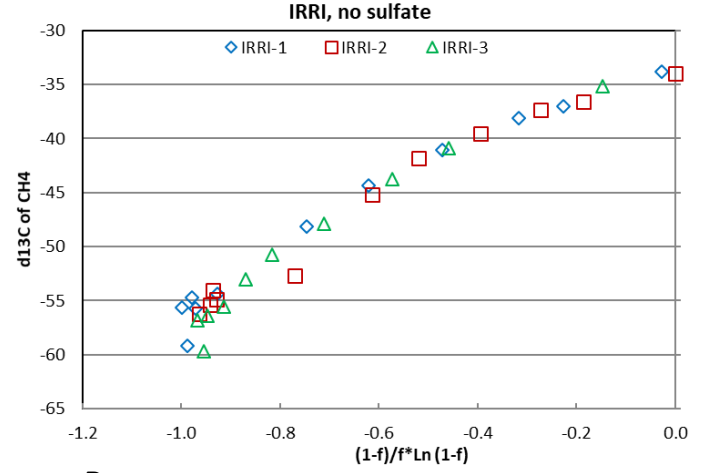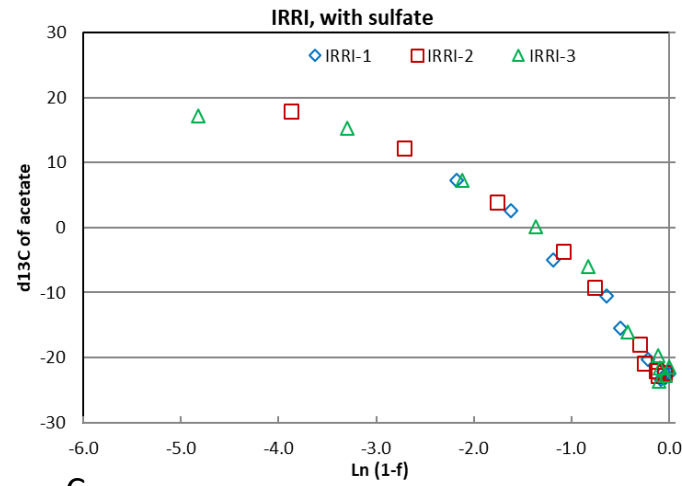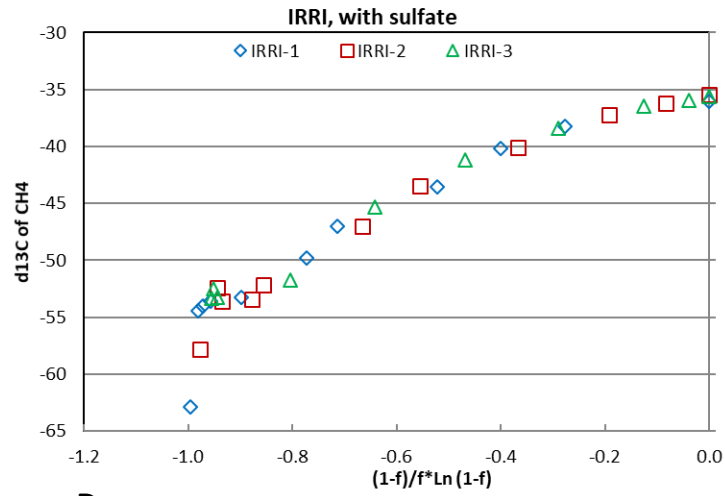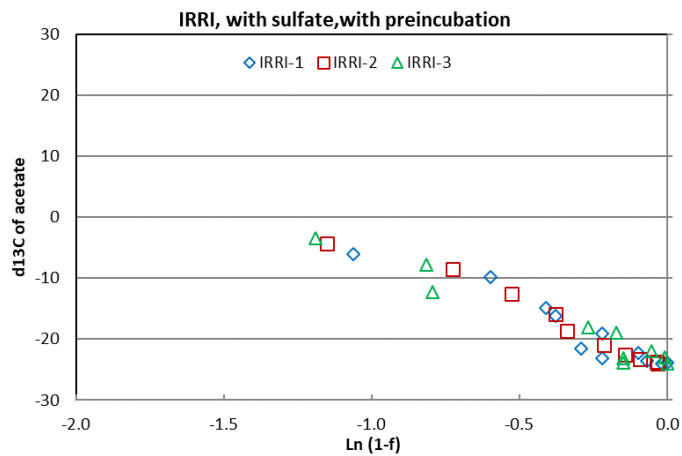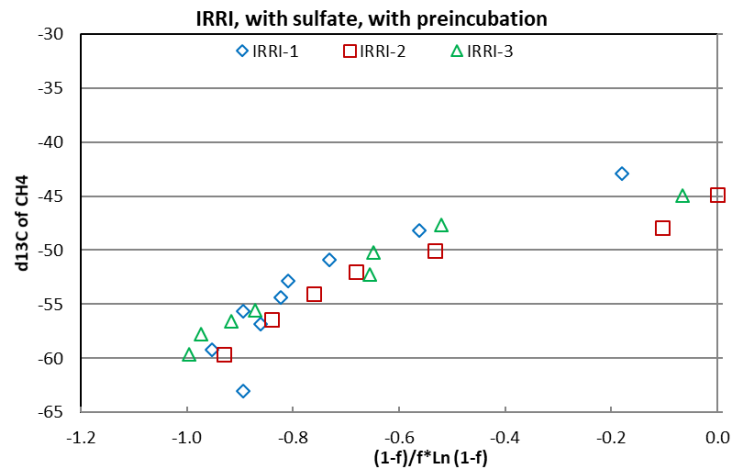

Fig. S10

# Incubation with sulfate + CH3F

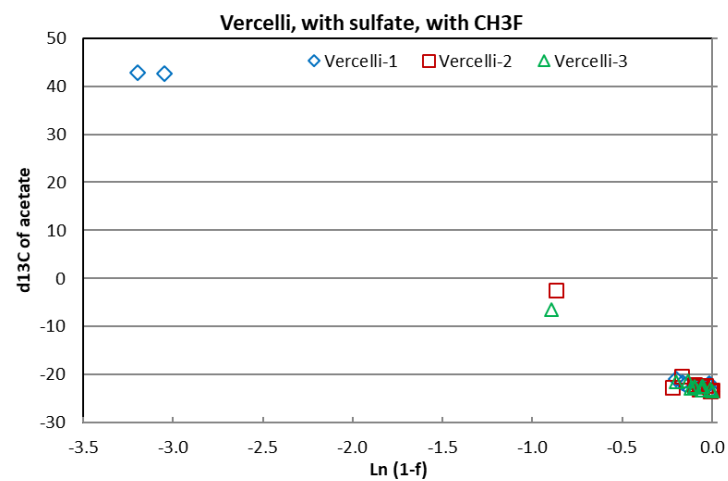

A

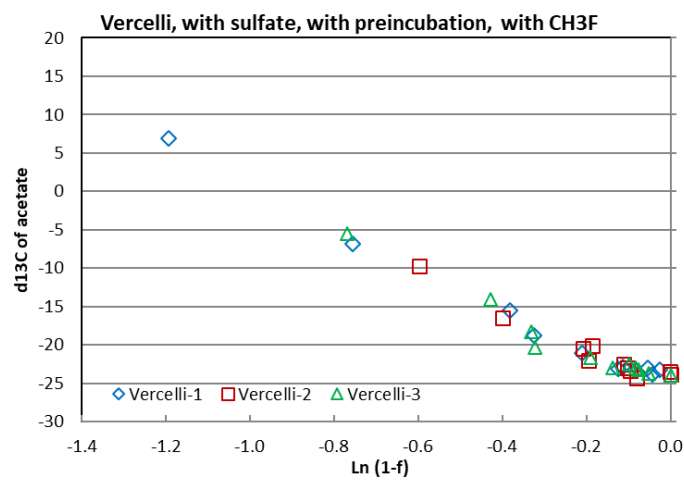

B

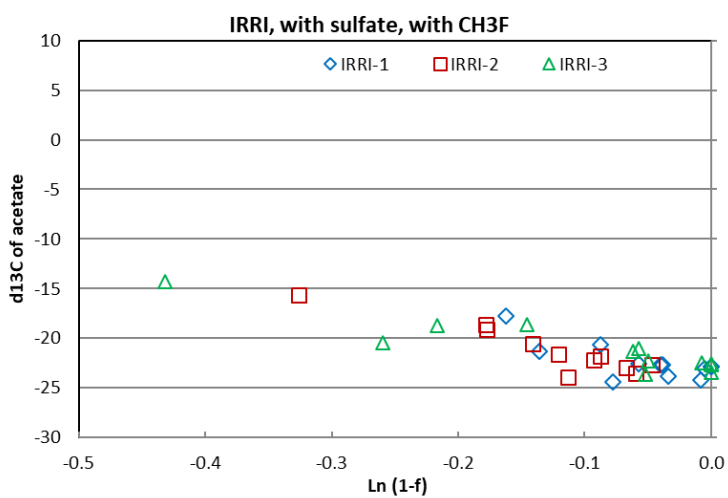

C

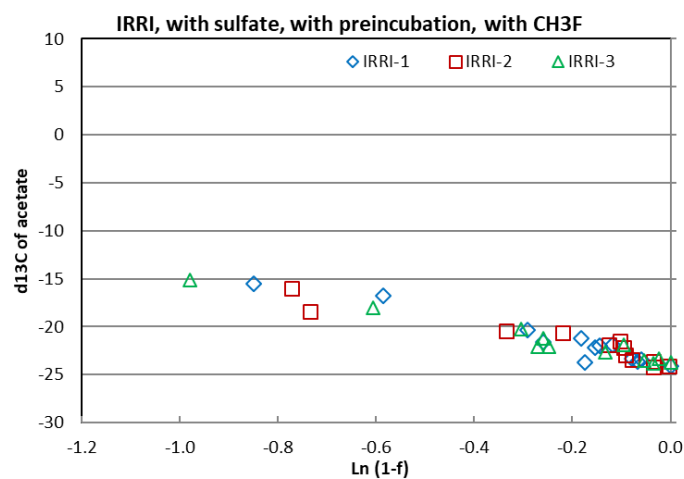

D

Fig. S11

# Fuchskuhle – SW without sulfate

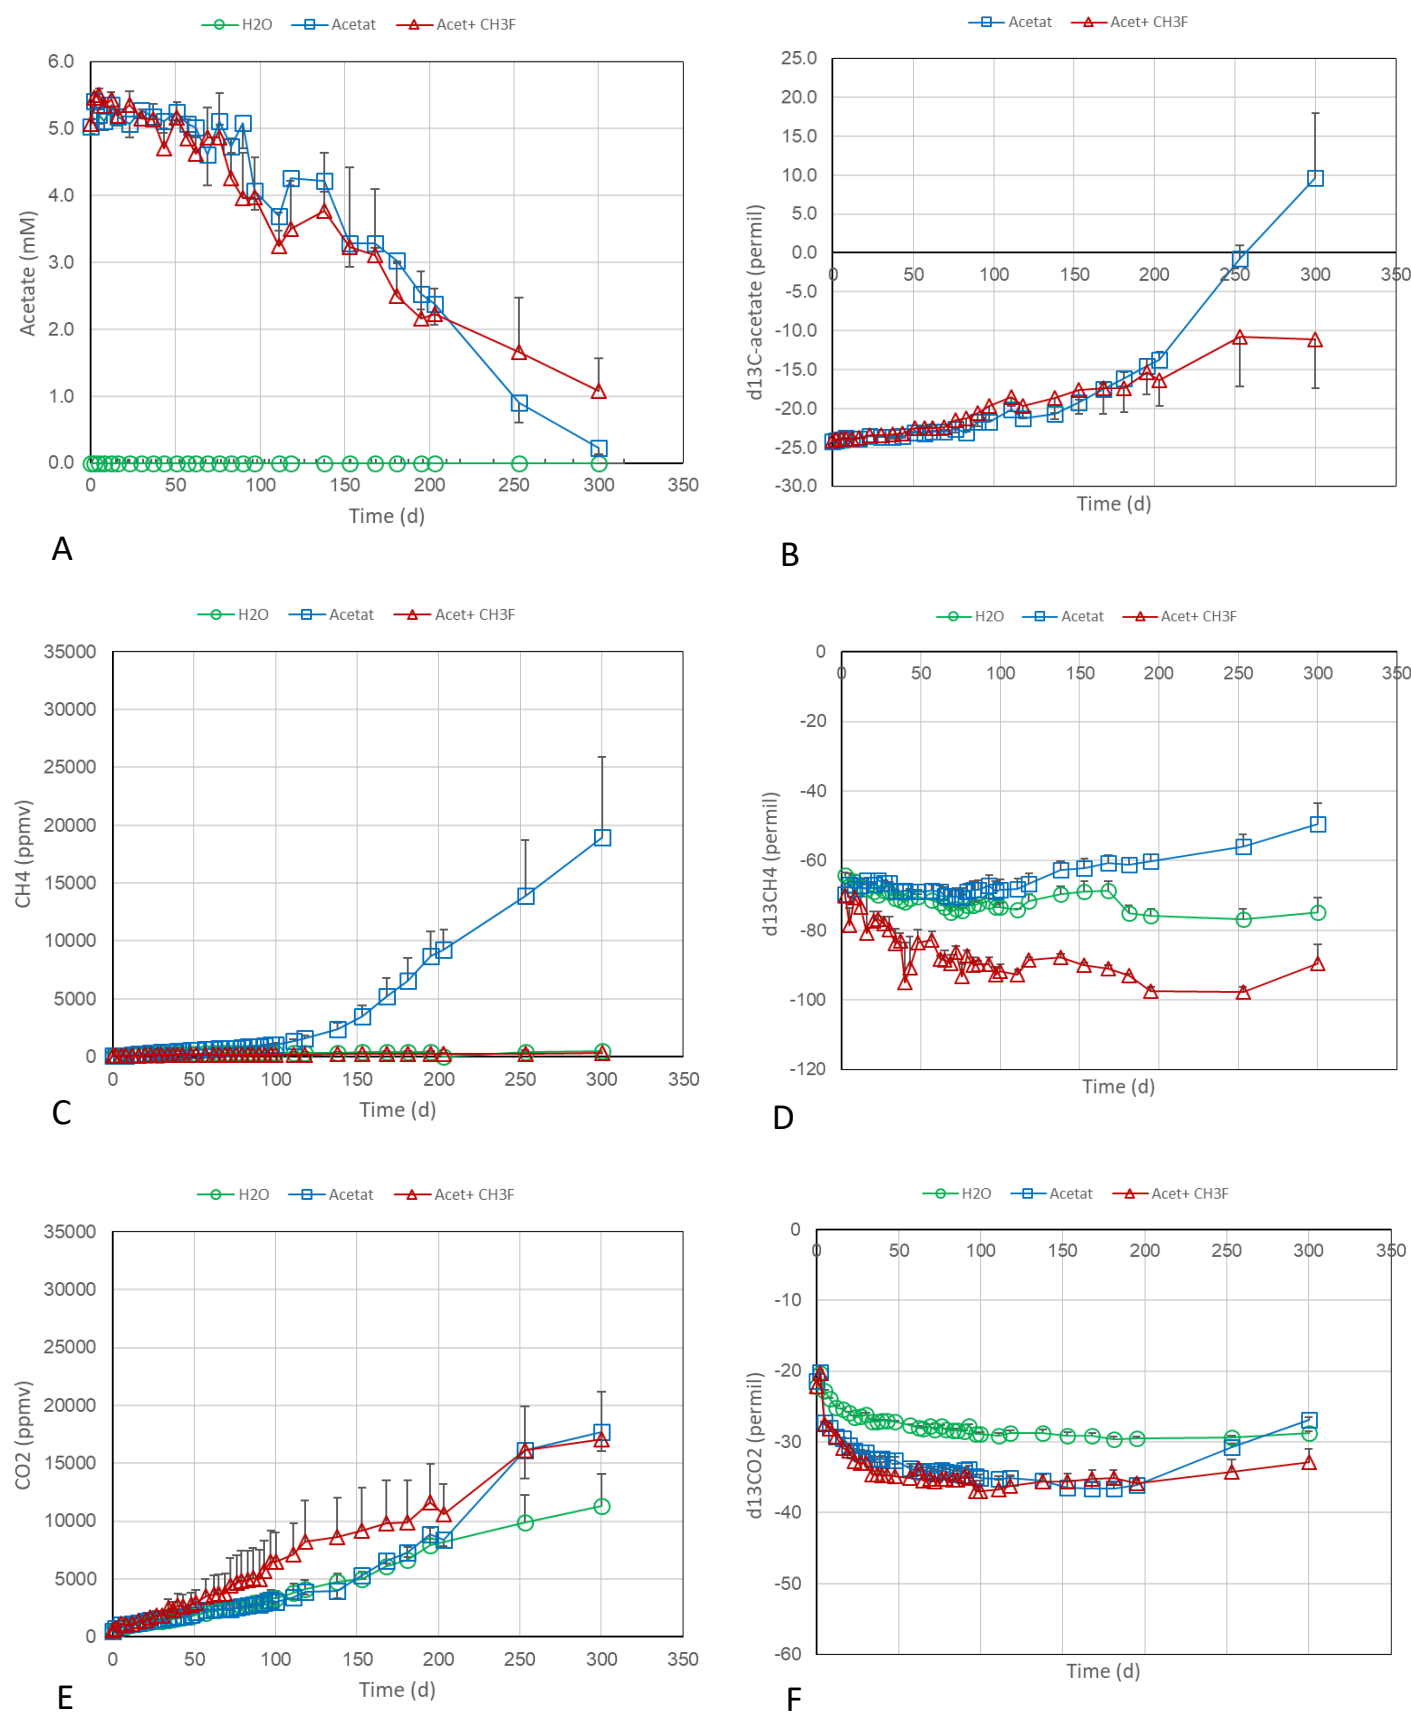

Fig. S12

# Fuchskuhle – SW with sulfate

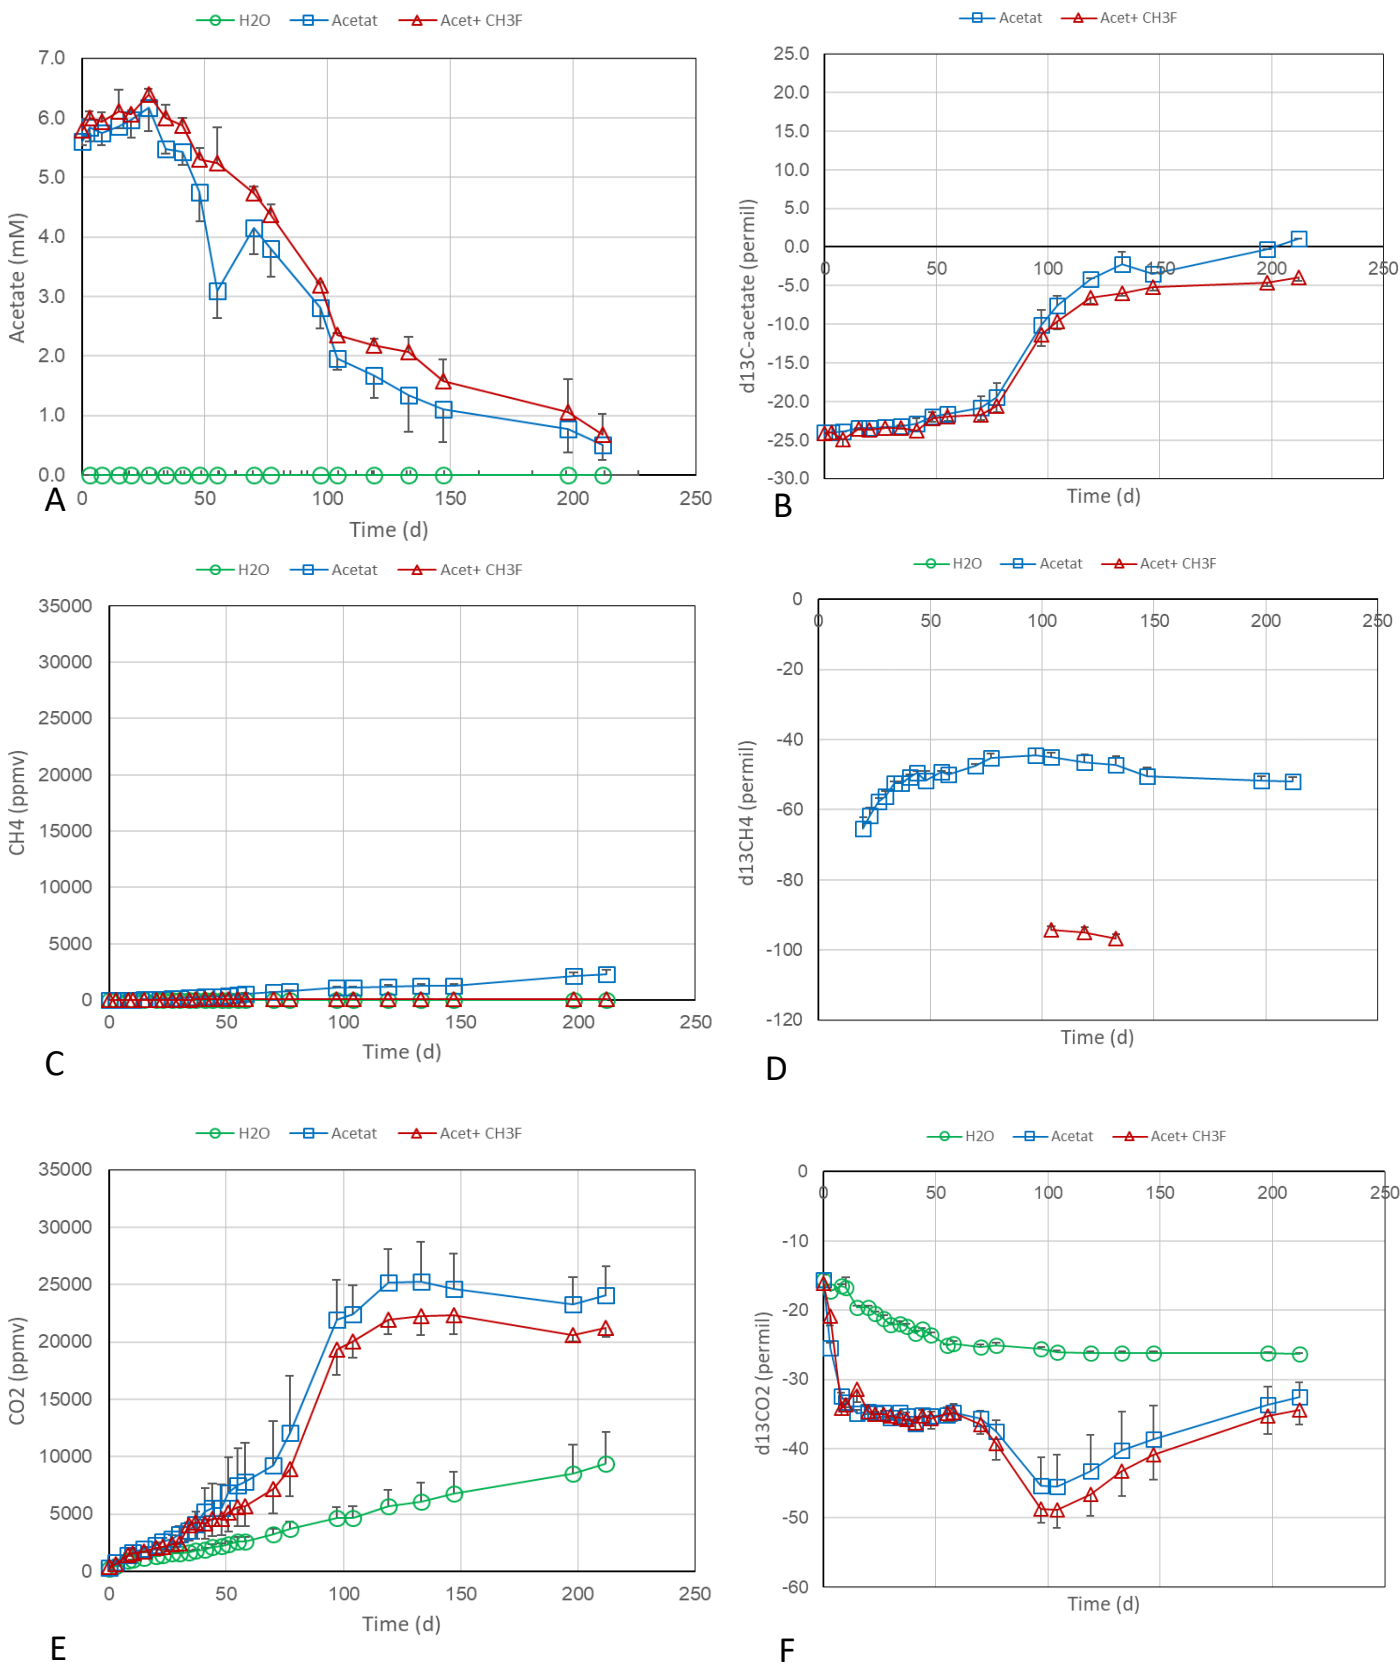

Fig. S13

# Fuchskuhle – NE

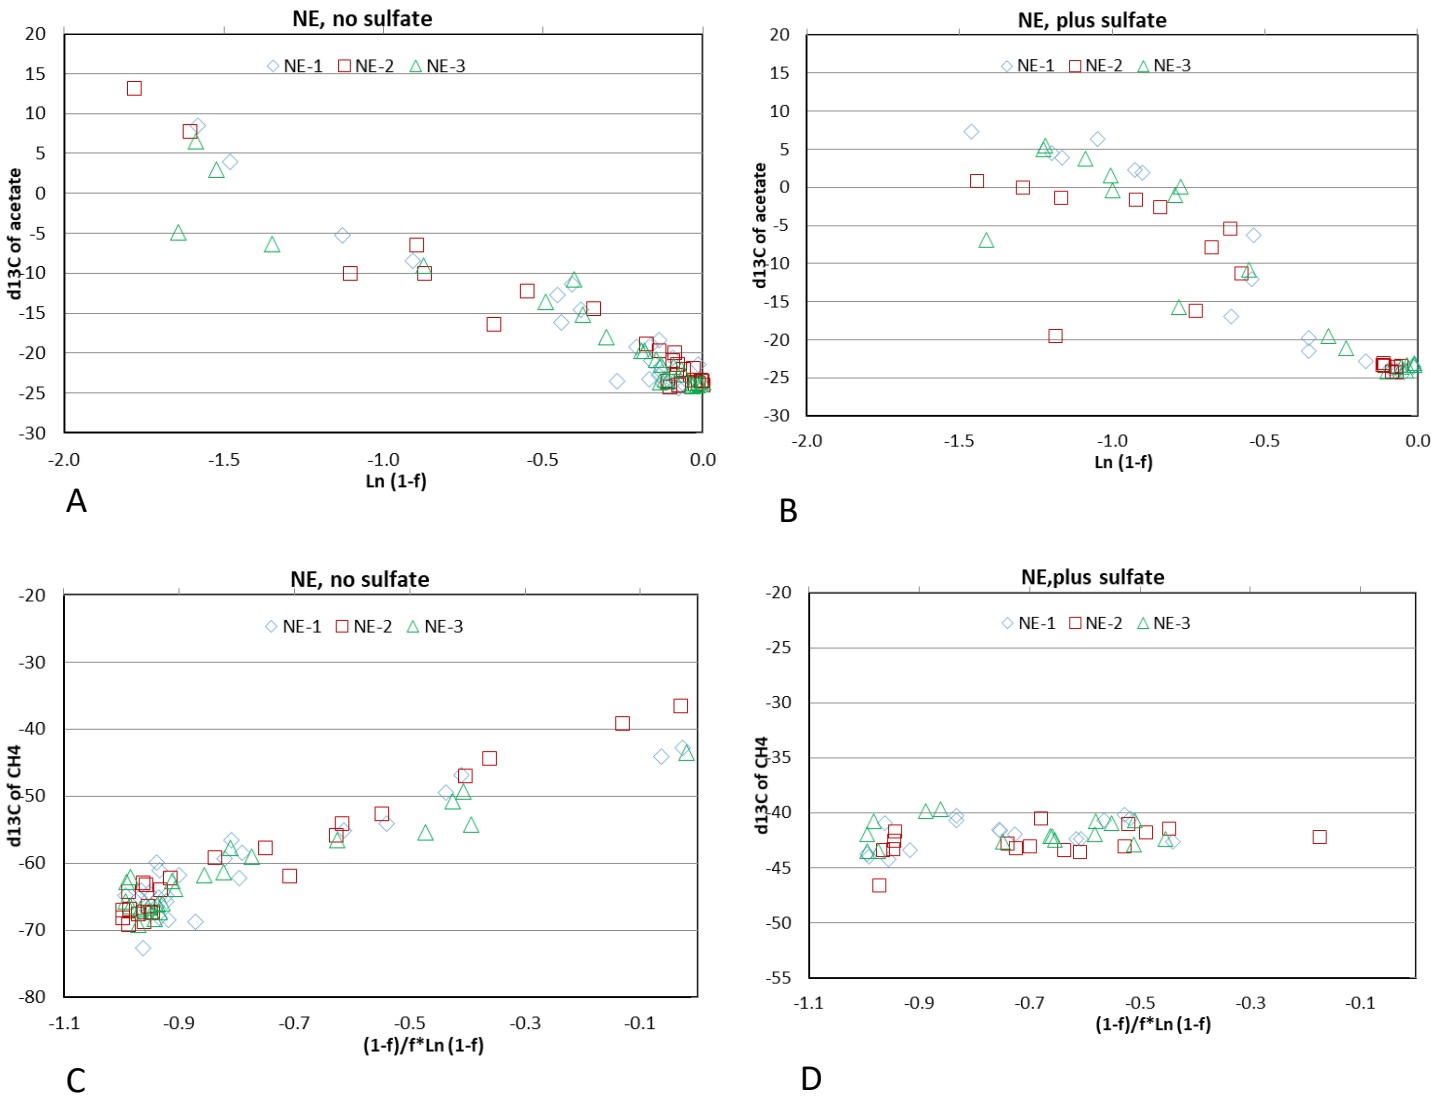

Fig. S14

# Fuchskuhle – SW

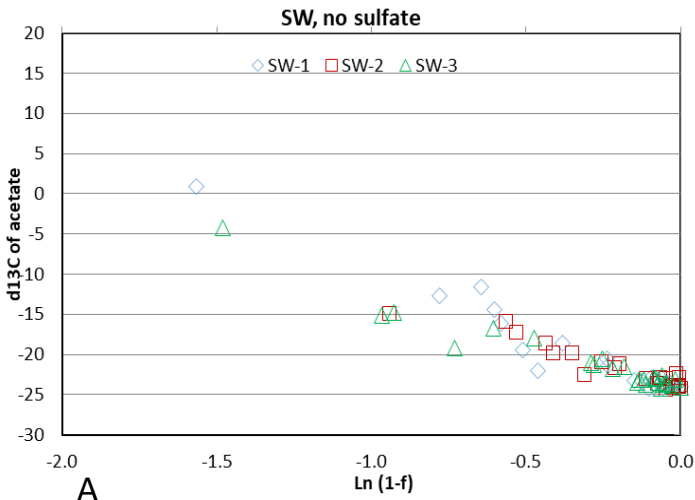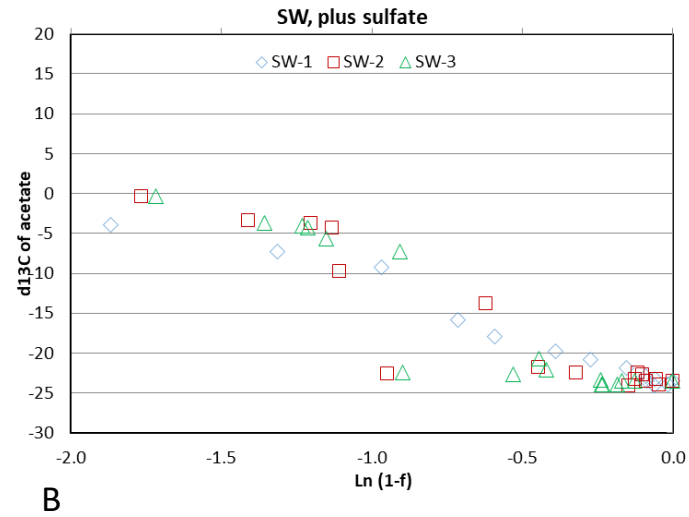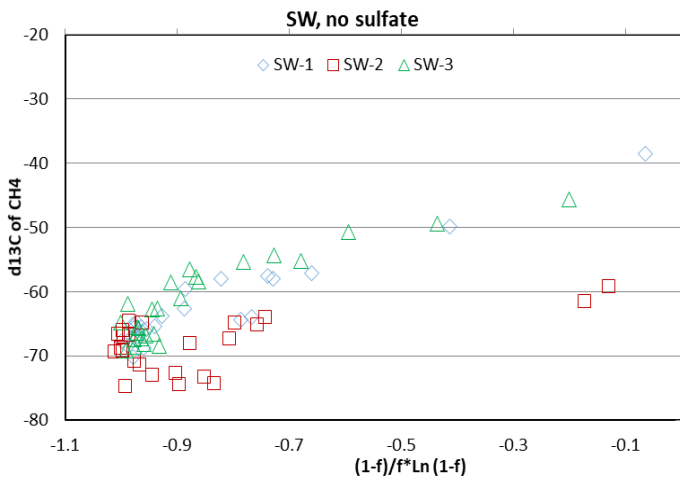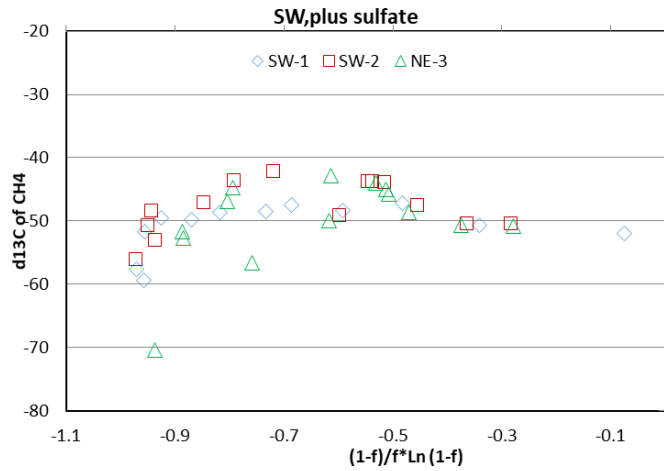

Fig. S15

Fuchskuhle  
Incubation with sulfate and with CH<sub>3</sub>F

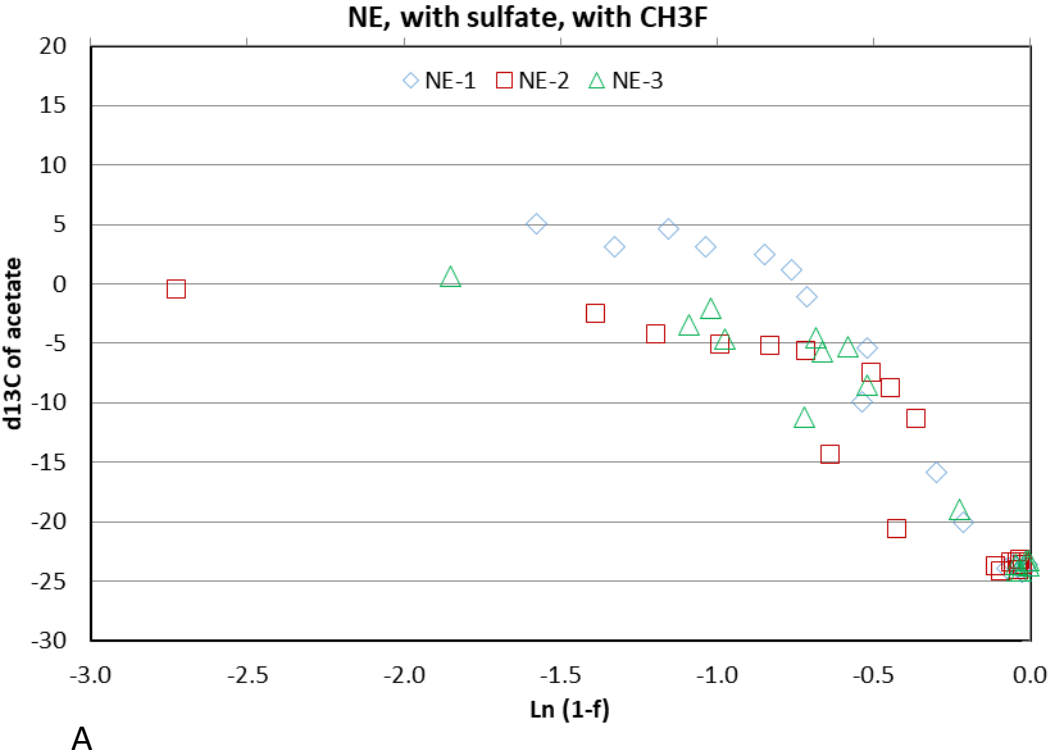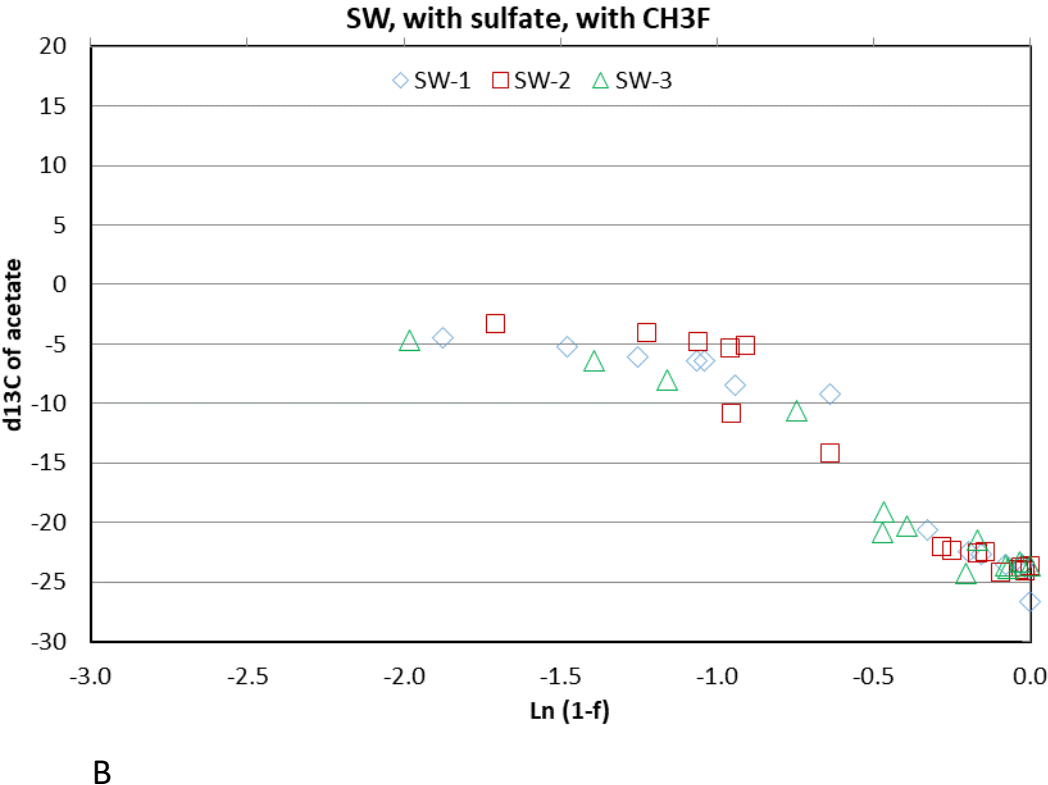

Fig. S16
